# Supplementary material for: Assessing the Potential for Photochemical Reflectance Index to Improve the Relationship between Solar-Induced Chlorophyll Fluorescence and Gross Primary Productivity in Crop and Soybean
Source: MDPI journal article supplement (doi:10.3390/atmos15040463), 2024-04-09
Supplement: s1 [file s1]

Archive with 1 entries (1 files):
- atmosphere-2922342-supplementary.pdf
